# Supplementary material for: A Highly Active Endo-Levanase BT1760 of a Dominant Mammalian Gut Commensal Bacteroides thetaiotaomicron Cleaves Not Only Various Bacterial Levans, but Also Levan of Timothy Grass
Source: PubMed Central journal article supplement (PMC5245892; doi:10.1371/journal.pone.0169989), 2017-01-19
Supplement: pone.0169989.s003.pdf [file pone.0169989.s003.pdf]

**A Highly Active Endo-Levanase BT1760 of a Dominant Mammalian Gut Commensal *Bacteroides thetaiotaomicron* Cleaves Not Only Various Bacterial Levans, but Also Levan of Timothy Grass**

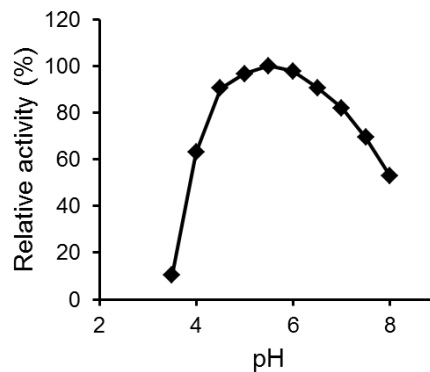

**S3 Fig. The effect of pH on levan-degrading activity of the endo-levanase BT1760.**

Degradation of Lsc3-produced levan (5 g/L) was measured in McIlvaine's buffers of varied pH. Reaction was conducted in microplate wells at 37°C and initial rate of turbidity decrease at 400 nm was recorded using a Tecan infinite M200 PRO™ reader (Tecan Group Ltd., Switzerland). The final volume of reaction mixture in the wells was 100 µl and 3 µg/mL of endo-levanase protein was added to start the reaction. Initial velocities of the reaction are presented as decrease of turbidity per minute per mg of protein. 100% of activity corresponded to  $47.4 \pm 5.0$  U/mg, measured at 37°C and pH 5.5. The average values were calculated from at least three parallel samples. Standard deviation values did not exceed 10%.
