# Supplementary material for: A Highly Active Endo-Levanase BT1760 of a Dominant Mammalian Gut Commensal Bacteroides thetaiotaomicron Cleaves Not Only Various Bacterial Levans, but Also Levan of Timothy Grass
Source: PubMed Central journal article supplement (PMC5245892; doi:10.1371/journal.pone.0169989), 2017-01-19
Supplement: pone.0169989.s005.pdf [file pone.0169989.s005.pdf]

## A Highly Active Endo-Levanase BT1760 of a Dominant Mammalian Gut Commensal *Bacteroides thetaiotaomicron* Cleaves Not Only Various Bacterial Levans, but Also Levan of Timothy Grass

S1 Table. Accession numbers of protein and gene sequences analysed in current work

| Protein (locus) designation                                                              | Protein (locus) characterization                           | Microorganism                                 | Accession No           |                               |
|------------------------------------------------------------------------------------------|------------------------------------------------------------|-----------------------------------------------|------------------------|-------------------------------|
|                                                                                          |                                                            |                                               | UniProtKB              | GenBank                       |
| Lsc3 (Lsc-3)                                                                             | Levansucrase <sup>#</sup>                                  | <i>Pseudomonas syringae</i> pv. tomato DC3000 | <a href="#">Q88BN6</a> | AAO59056.1                    |
| BT1760                                                                                   | Endo-levanase*                                             | <i>Bacteroides thetaiotaomicron</i> VPI-5482  | <a href="#">Q8A6W6</a> | AAO76867.1                    |
| BT1754                                                                                   | Hybrid two-component sensing and regulatory system (HTCS)* | <i>Bacteroides thetaiotaomicron</i> VPI-5482  | <a href="#">Q8A6X1</a> | AAO76861.1                    |
| BT1757                                                                                   | Fructokinase*                                              | <i>Bacteroides thetaiotaomicron</i> VPI-5482  | <a href="#">Q8A6W9</a> | AAO76864.1                    |
| BT1758                                                                                   | Inner membrane monosaccharide importer*                    | <i>Bacteroides thetaiotaomicron</i> VPI-5482  | <a href="#">Q8A6W8</a> | AAO76865.1                    |
| BT1759                                                                                   | Exo-acting fructanase*                                     | <i>Bacteroides thetaiotaomicron</i> VPI-5482  | <a href="#">Q8A6W7</a> | AAO76866.1                    |
| BT1761                                                                                   | Protein specifically binding levan*                        | <i>Bacteroides thetaiotaomicron</i> VPI-5482  | <a href="#">Q8A6W5</a> | AAO76868.1                    |
| BT1762                                                                                   | Levan-specific SusD homologue*                             | <i>Bacteroides thetaiotaomicron</i> VPI-5482  | <a href="#">Q8A6W4</a> | AAO76869.1                    |
| BT1763                                                                                   | SusC homologue*                                            | <i>Bacteroides thetaiotaomicron</i> VPI-5482  | <a href="#">Q8A6W3</a> | AAO76870.1                    |
| BT1765                                                                                   | Exo-acting fructanase*                                     | <i>Bacteroides thetaiotaomicron</i> VPI-5482  | <a href="#">Q8A6W1</a> | AAO76872.1                    |
| BT3082                                                                                   | Exo-acting fructanase*                                     | <i>Bacteroides thetaiotaomicron</i> VPI-5482  | <a href="#">Q8A373</a> | AAO78188.1                    |
| Genomic region (76953-98008 nt, reverse); supercontig 1.5, whole genome shotgun sequence | Putative fructan PUL                                       | <i>Bacteroides xylanisolvens</i> CL03T12C04   |                        | <a href="#">NZ_JH724298.1</a> |
| HMPREF1074_04233                                                                         | Homologous to BT1760                                       | <i>Bacteroides xylanisolvens</i> CL03T12C04   | <a href="#">I9UP90</a> | EIY84278.1                    |
| HMPREF1074_04239                                                                         | Homologous to BT1754                                       | <i>Bacteroides xylanisolvens</i> CL03T12C04   | <a href="#">I9JCE0</a> | EIY84284.1                    |
| HMPREF1074_04236                                                                         | Homologous to BT1757                                       | <i>Bacteroides xylanisolvens</i> CL03T12C04   | <a href="#">I9UNP0</a> | EIY84281.1                    |
| HMPREF1074_04235                                                                         | Homologous to BT1758                                       | <i>Bacteroides xylanisolvens</i> CL03T12C04   | <a href="#">I9A953</a> | EIY84280.1                    |
| HMPREF1074_04234                                                                         | Homologous to BT1759                                       | <i>Bacteroides xylanisolvens</i> CL03T12C04   | <a href="#">I9JCD5</a> | EIY84279.1                    |
| HMPREF1074_04232                                                                         | Homologous to BT1761                                       | <i>Bacteroides xylanisolvens</i> CL03T12C04   | <a href="#">I9AAC9</a> | EIY84277.1                    |
| HMPREF1074_04231                                                                         | Homologous to BT1762                                       | <i>Bacteroides xylanisolvens</i> CL03T12C04   | <a href="#">I9UNN7</a> | EIY84276.1                    |
| HMPREF1074_04230                                                                         | Homologous to BT1763                                       | <i>Bacteroides xylanisolvens</i> CL03T12C04   | <a href="#">I9A947</a> | EIY84275.1                    |
| HMPREF1074_04228                                                                         | Homologous to BT1765                                       | <i>Bacteroides xylanisolvens</i> CL03T12C04   | <a href="#">I9UP85</a> | EIY84273.1                    |
| LevB1                                                                                    | Endo-levanase                                              | <i>Bacillus licheniformis</i> strain IBT-ALM  | <a href="#">W8GV60</a> | AHK25455.1                    |
| LevB                                                                                     | Endo-levanase                                              | <i>Bacillus subtilis</i> 168                  | <a href="#">O07003</a> | CAB15451.1                    |
|                                                                                          | Endo-levanase                                              | <i>Butyrivibrio fibrisolvens</i> 16/4         | <a href="#">D4IW69</a> | CBK75012.1                    |
| INU2                                                                                     | Endo-inulinase                                             | <i>Aspergillus ficuum</i>                     | <a href="#">O94220</a> | AJ006951.1                    |

<sup>#</sup>Characterized in refs [22,40 and 45] of the main text.

\*Function addressed in Sonnenburg et al. (2010), ref [7] of the main text.
